# Supplementary material
Source: Springer Nature journal article supplement (https://www.springermedizin.de/resource/supplementary/13046_2009_194_MOESM5_ESM.pdf/9661516)

A

B

C

D

E

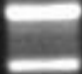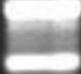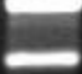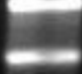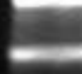

Supplement: MOESM5 [file 9661516]
